# Supplementary material for: Chitosan Based Aerogels with Low Shrinkage by Chemical Cross-Linking and Supramolecular Interaction
Source: MDPI journal article supplement (doi:10.3390/gels8020131), 2022-02-18
Supplement: s1 [file s1]

***Chitosan Based Aerogels with Low Shrinkage by Chemical Cross-Linking and Supramolecular Interaction***

*Sizhao Zhang,<sup>1,2,\*</sup> Qi Xiao,<sup>1</sup> Yunyun Xiao,<sup>1,\*</sup> Zhengquan Li,<sup>1</sup> Shixian Xiong,<sup>1</sup> Feng Ding,<sup>1</sup> Junpeng He<sup>1</sup>*

*<sup>1</sup> Polymer Aerogels Research Center, Jiangxi University of Science and Technology, Ganzhou 341000, Jiangxi, PR China*

*<sup>2</sup> Postdoctoral Research Station on Mechanics, College of Aerospace Science and Engineering, National University of Defense Technology, Changsha 410073, Hunan, PR China*

***Supporting Information***

*\* Correspondence and requests for materials should be addressed to Sizhao Zhang (E-mail: zhangsz@jxust.edu.cn).*

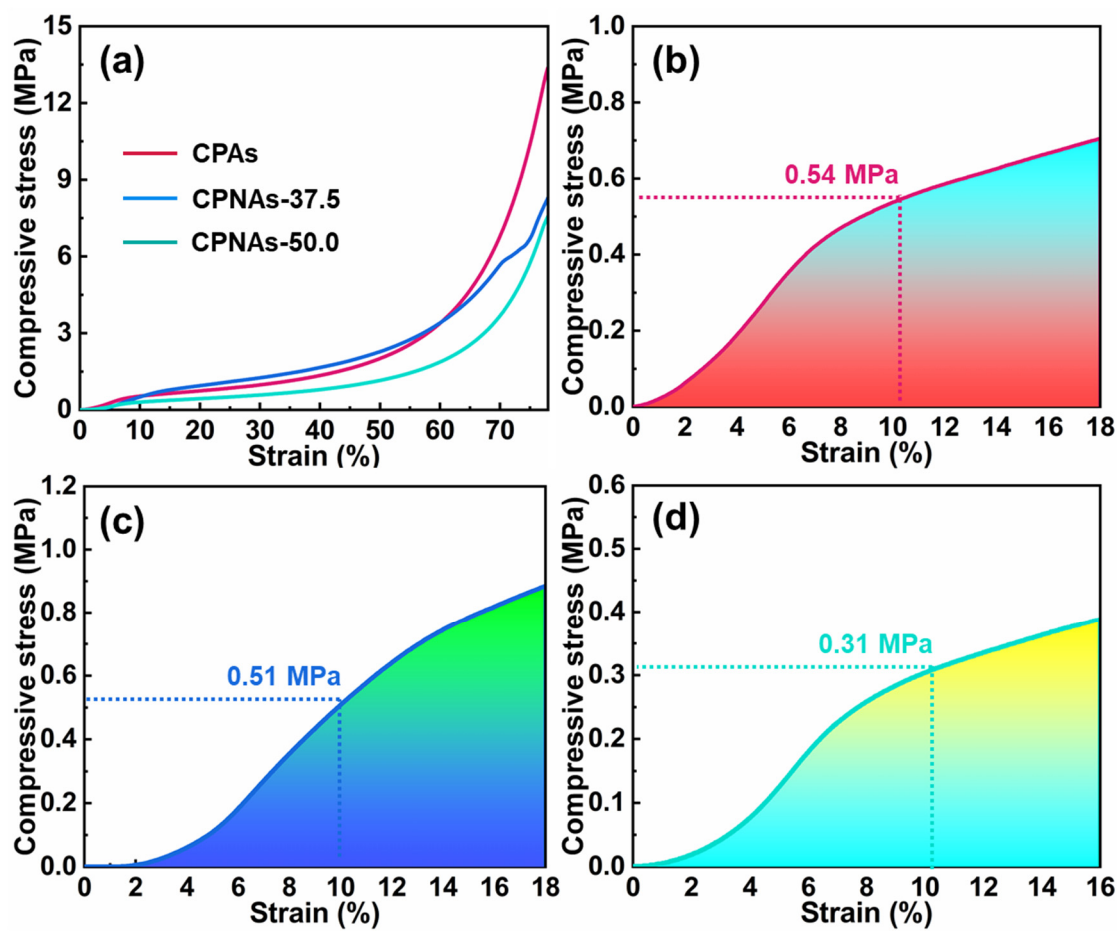

Figure S1. Compressive stress-strain curves of CPNAs up to 75% strain (a); compressive stress-strain curves at low strain for CPAs (b), CPNAs-37.5 (c), and CPNAs-50.0 (d).

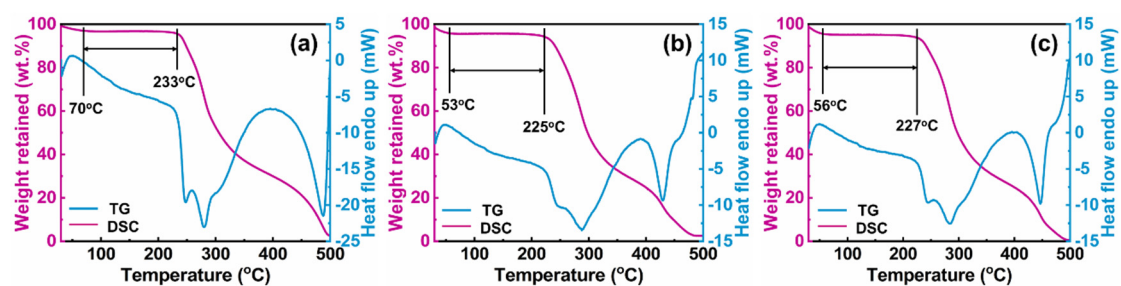

Figure S2. TG and DSC curves of CPAs (a), CPNAs-37.5 (b), and CPNAs-50.0 (c).
